# Supplementary material for: Gut microbiota of obese and diabetic Thai subjects and interplay with dietary habits and blood profiles
Source: PubMed Central journal article supplement (PMC7409811; doi:10.7717/peerj.9622), 2020-08-03
Supplement: peerj-08-9622-s012.pdf [file peerj-08-9622-s012.pdf]

## Participant characteristics

| No. | Questions/Answers                                                                                                                                                                                 | Variable name | Results |
|-----|---------------------------------------------------------------------------------------------------------------------------------------------------------------------------------------------------|---------------|---------|
| 1   | Code of volunteer <input type="text"/> <input type="text"/> - <input type="text"/> - <input type="text"/> <input type="text"/>                                                                    | Code          |         |
| 2   | Birth date dd/mm/year <input type="text"/> <input type="text"/> - <input type="text"/> <input type="text"/> - <input type="text"/> <input type="text"/> <input type="text"/> <input type="text"/> | Birth date    |         |
| 3   | Age <input type="text"/> <input type="text"/> year                                                                                                                                                | Age           |         |
| 4   | Gender <input type="checkbox"/> 1) Male <input type="checkbox"/> 2) Female                                                                                                                        | Gender        |         |
| 5   | Blood pressure (Systolic BP) <input type="text"/> <input type="text"/> <input type="text"/> / <input type="text"/> <input type="text"/> <input type="text"/> mmHg                                 | SBP           |         |
| 6   | Blood pressure (Diastolic BP) <input type="text"/> <input type="text"/> <input type="text"/> / <input type="text"/> <input type="text"/> <input type="text"/> mmHg                                | DBP           |         |
| 7   | Weight <input type="text"/> <input type="text"/> <input type="text"/> . <input type="text"/> <input type="text"/> kg                                                                              | Weight        |         |
| 8   | Height <input type="text"/> <input type="text"/> <input type="text"/> . <input type="text"/> <input type="text"/> cm                                                                              | Height        |         |

## Food frequency questionnaire (FFQ)

| No. | Questions                     | Frequency per week |           |          |          |          |                       |       | Variable name | Type    | Results |
|-----|-------------------------------|--------------------|-----------|----------|----------|----------|-----------------------|-------|---------------|---------|---------|
|     |                               | Answer             | Every day | 5-6 days | 3-4 days | 1-2 days | Less than once a week | Never |               |         |         |
|     |                               | Score              | 6         | 5        | 4        | 3        | 2                     | 1     |               |         |         |
| 1   | Pork                          |                    |           |          |          |          |                       |       | OQ-1          | Ordinal |         |
| 2   | Chicken                       |                    |           |          |          |          |                       |       | OQ-2          | Ordinal |         |
| 3   | Fish                          |                    |           |          |          |          |                       |       | OQ-3          | Ordinal |         |
| 4   | Beef                          |                    |           |          |          |          |                       |       | OQ-4          | Ordinal |         |
| 5   | Egg                           |                    |           |          |          |          |                       |       | OQ-5          | Ordinal |         |
| 6   | Dairy products                |                    |           |          |          |          |                       |       | OQ-6          | Ordinal |         |
| 7   | Pea/nut/bean                  |                    |           |          |          |          |                       |       | OQ-7          | Ordinal |         |
| 8   | Yogurts/Cheese/fermented milk |                    |           |          |          |          |                       |       | OQ-8          | Ordinal |         |
| 9   | Sticky rice                   |                    |           |          |          |          |                       |       | OQ-9          | Ordinal |         |
| 10  | Steamed rice                  |                    |           |          |          |          |                       |       | OQ-10         | Ordinal |         |
| 11  | Brown rice                    |                    |           |          |          |          |                       |       | OQ-11         | Ordinal |         |
| 12  | Mixed rice                    |                    |           |          |          |          |                       |       | OQ-12         | Ordinal |         |
| 13  | Rice vermicelli               |                    |           |          |          |          |                       |       | OQ-13         | Ordinal |         |
| 14  | Bread                         |                    |           |          |          |          |                       |       | OQ-14         | Ordinal |         |
| 15  | Grain                         |                    |           |          |          |          |                       |       | OQ-15         | Ordinal |         |
| 16  | Green vegetable               |                    |           |          |          |          |                       |       | OQ-16         | Ordinal |         |
| 17  | Fermented fruits/vegetable    |                    |           |          |          |          |                       |       | OQ-17         | Ordinal |         |
| 18  | Specified vegetables          |                    |           |          |          |          |                       |       | OQ-18         | Ordinal |         |
| 19  | Fruit                         |                    |           |          |          |          |                       |       | OQ-19         | Ordinal |         |
| 20  | Tea                           |                    |           |          |          |          |                       |       | OQ-20         | Ordinal |         |
| 21  | Coffee                        |                    |           |          |          |          |                       |       | OQ-21         | Ordinal |         |
| 22  | Carbonate soft drink          |                    |           |          |          |          |                       |       | OQ-22         | Ordinal |         |
| 23  | Juice                         |                    |           |          |          |          |                       |       | OQ-23         | Ordinal |         |
| 24  | Energy drink                  |                    |           |          |          |          |                       |       | OQ-24         | Ordinal |         |
| 25  | Alcoholic beverage            |                    |           |          |          |          |                       |       | OQ-25         | Ordinal |         |
