# Supplementary material for: Gut microbiota of obese and diabetic Thai subjects and interplay with dietary habits and blood profiles
Source: PeerJ. 2020 Aug 3;8:e9622. doi: 10.7717/peerj.9622 (PMC7409811; doi:10.7717/peerj.9622)
Supplement: Supplemental Information 2 [file peerj-08-9622-s002.xlsx]

## Sheet: Sheet1
Table S2: Sequencing data processing of each sample.
Sample name	Group	Raw reads	Combined reads	Qualified reads	Effective reads	Base (nt)	Average sequence length (nt)	Q20	Q30	GC%	Effective (%)
MU.B22	OB	148265	135939	122190	116438	47993401	412	98.65	97.31	53.38	78.53
MU.B23	OB	143920	131568	117000	113673	47245038	416	98.57	97.13	53.76	78.98
PD.B07	OB	144165	130026	115271	109537	45743201	418	98.56	97.14	51.72	75.98
PR.B21	OB	147201	133997	119076	112954	47064557	417	98.58	97.18	52.72	76.73
MC.B13	OB	152444	138825	121867	116325	48932144	421	98.57	97.17	52.96	76.31
MS.B09	OB	159352	144309	128555	123344	51354346	416	98.61	97.23	52.12	77.4
MS.B16	OB	153611	139430	123432	118842	49799800	419	98.57	97.15	52.14	77.37
MS.D02	T2DM	157293	142565	128205	115715	47805908	413	98.64	97.3	52.01	73.57
MS.D03	T2DM	143390	129648	115249	108801	45301266	416	98.62	97.25	52.29	75.88
MS.D04	T2DM	146912	131847	118206	109771	45363393	413	98.63	97.31	51.28	74.72
MS.D07	T2DM	142652	128289	114634	108529	45127439	416	98.66	97.35	49.83	76.08
MS.D08	T2DM	140821	126989	113192	108146	44774034	414	98.58	97.2	52.19	76.8
MS.D12	T2DM	142085	128686	114599	110132	46119629	419	98.61	97.22	52.03	77.51
MS.D24	T2DM	140377	129235	117322	113066	46343801	410	98.65	97.32	53.15	80.54
MS.L01	L	156689	140466	125044	119371	49558360	415	98.57	97.15	51.22	76.18
MS.L11	L	150925	136403	121289	116555	48798175	419	98.63	97.27	51.87	77.23
MS.L14	L	140687	126921	111959	107426	45068398	420	98.58	97.17	51.89	76.36
MS.L19	L	143929	129385	116303	109104	45170081	414	98.63	97.3	50.86	75.8
MS.L20	L	148759	135010	120781	111983	46504422	415	98.66	97.33	51.91	75.28
MS.L22	L	144293	130825	116898	107736	44743839	415	98.65	97.3	52.16	74.66
MS.L23	L	156308	141971	124940	116790	48860546	418	98.59	97.19	53.53	74.72
MS.L25	L	145225	131618	117771	112475	46727021	415	98.65	97.32	52.2	77.45
MS.V05	OV	141120	128096	114843	105955	43873473	414	98.64	97.3	51.66	75.08
MS.V06	OV	142877	128898	114960	109517	45557698	416	98.63	97.29	51.28	76.65
MS.V10	OV	157964	142551	126405	121254	50725590	418	98.58	97.19	52	76.76
MS.V13	OV	149074	134686	119563	112586	47203136	419	98.58	97.17	51.92	75.52
MS.V15	OV	155242	140211	125276	113598	47310106	416	98.62	97.26	51.18	73.17
MS.V17	OV	159272	142206	125594	117919	49232694	418	98.58	97.18	51.5	74.04
MS.V18	OV	150627	137515	123386	119099	49423303	415	98.63	97.27	52.26	79.07
MS.V21	OV	154557	140721	127224	121742	50047728	411	98.64	97.25	52.98	78.77
