# Supplementary material for: Gut microbiota of obese and diabetic Thai subjects and interplay with dietary habits and blood profiles
Source: PeerJ. 2020 Aug 3;8:e9622. doi: 10.7717/peerj.9622 (PMC7409811; doi:10.7717/peerj.9622)
Supplement: Supplemental Information 3 [file peerj-08-9622-s003.xlsx]

## Sheet: Sheet1
Table S3: OTU richness and diversity indices of each sample.
Sample name	Group	Total reads	OTUs	ACE	Chao1	Observed species	Shannon	Simpson	Good’s coverage
PD.B07	OB	109537	482	469.871	461.679	443	5.348	0.942	1
MC.B13	OB	116325	492	480.905	478.4	443	4.225	0.835	0.999
PR.B21	OB	112954	488	494.598	500.135	457	5.4	0.937	0.999
MU.B22	OB	116438	465	449.718	440.558	424	5.362	0.933	1
MU.B23	OB	113673	499	492.902	488	458	5.158	0.942	0.999
MS.B09	OB	123344	506	499.894	498.083	466	5.254	0.923	0.999
MS.B16	OB	118842	463	459.388	453.059	425	4.907	0.92	0.999
MS.L01	L	119371	462	471.338	467.596	436	5.378	0.935	0.999
MS.L11	L	116555	501	504.582	496.518	467	4.885	0.891	0.999
MS.L14	L	107426	503	508.265	497.679	465	5.215	0.929	0.999
MS.L19	L	109104	541	542.761	542.458	495	5.755	0.957	0.999
MS.L20	L	111983	561	551.934	552.06	513	5.311	0.909	0.999
MS.L22	L	107736	521	519.756	511.5	484	5.135	0.897	0.999
MS.L23	L	116790	536	546.439	531.087	500	5.158	0.906	0.999
MS.L25	L	112475	547	536.02	535.083	503	4.949	0.88	0.999
MS.V05	OV	105955	468	575.119	571.179	468	5.257	0.933	0.999
MS.V06	OV	109517	454	447.177	443.333	415	5.094	0.921	1
MS.V10	OV	121254	481	478.357	492.459	443	4.396	0.827	0.999
MS.V13	OV	112586	510	511.783	520.775	478	4.383	0.781	0.999
MS.V15	OV	113598	480	471.336	467.957	438	5.095	0.885	0.999
MS.V17	OV	117919	477	464.978	459.708	431	5.141	0.923	0.999
MS.V18	OV	119099	502	493.536	488.679	470	4.348	0.825	1
MS.V21	OV	121742	521	513.599	505.016	476	5.044	0.912	0.999
MS.D02	T2DM	115715	579	571.235	568.196	538	6.211	0.969	0.999
MS.D03	T2DM	108801	526	523.917	518.552	492	5.467	0.948	0.999
MS.D04	T2DM	109771	526	529.971	531	498	6.102	0.968	0.999
MS.D07	T2DM	108529	522	495.738	489.782	477	4.835	0.896	1
MS.D08	T2DM	108146	563	557.674	551	523	5.285	0.904	0.999
MS.D12	T2DM	110132	463	466.245	457.7	428	4.408	0.845	0.999
MS.D24	T2DM	113066	491	511.305	515.667	462	4.989	0.901	0.999
