# Supplementary material for: Gut microbiota of obese and diabetic Thai subjects and interplay with dietary habits and blood profiles
Source: PeerJ. 2020 Aug 3;8:e9622. doi: 10.7717/peerj.9622 (PMC7409811; doi:10.7717/peerj.9622)
Supplement: Supplemental Information 13 — Raw questionnaire data collected from subjects that participated in this study. [file peerj-08-9622-s013.xlsx]

## Sheet: Sheet1
Subject	Group	Age	Gender	BMI (kg/m2)	Weight (kg)	Height (cm)	Blood pressure (BP)		Total cholesterol (mg/dL)	LDL cholesterol (mg/dL)	HDL cholesterol (mg/dL)	Triglyceride (mg/dL)	Fasting glucose (mg/dL)	OQ-1	OQ-2	OQ-3	OQ-4	OQ-5	OQ-6	OQ-7	OQ-8	OQ-9	OQ-10	OQ-11	OQ-12	OQ-13	OQ-14	OQ-15	OQ-16	OQ-17	OQ-18	OQ-19	OQ-20	OQ-21	OQ-22	OQ-23	OQ-24	OQ-25
							Systolic BP (mmHg)	Diastolic BP (mmHg)						Pork	Chicken	Fish	Beef	Egg	Dairy products	Pea/nut/bean	Yogurts/Cheese/fermented milk	Sticky rice	Steamed rice	Brown rice	Mixed rice	Rice vermicelli	Bread	Grain	Green vegetable	Fermented fruits/vegetable	Specified vegetables	Fruit	Tea	Coffee	Carbonate soft drink	Juice	Energy drink	Alcoholic beverage
MS.L01	Lean	54	2	23.5556	53	150	128	83	203	92	98	65	93	6	4	5	1	4	1	2	4	6	1	1	1	4	1	2	4	1	5	3	6	1	1	5	1	6
MS.L11	Lean	49	2	22.6562	58	160	159	108	190	110	62	90	104	4	4	4	1	6	5	4	4	6	6	1	6	4	4	2	1	6	5	4	1	6	1	6	1	2
MS.L14	Lean	41	2	24.6097	67	165	122	86	270	150	65	271	88	3	3	3	3	3	1	3	3	6	3	1	1	3	3	3	4	4	5	4	1	6	3	3	3	3
MS.L19	Lean	40	2	20.83	52	158	147	94	167	47	94	126	80	5	4	6	3	4	1	2	3	4	5	1	1	4	1	3	5	3	6	3	1	5	5	1	5	5
MS.L20	Lean	42	2	23.9224	56	153	116	74	202	110	74	93	95	4	4	4	3	4	1	2		6	4	1	1	3	2	2	5	4	4		1	4	1	2	3	4
MS.L22	Lean	54	1	24.8591	71	169	116	78	160	92	59	48	86	5	2	4	2	4	5	4	4	6	4	2	2	2	2	2	6	5	4	4	4	5	3	3	4	1
MS.L23	Lean	64	2	24.1965	53	148	156	88	287	175	64	239	98	3	3	3	3	3	1	3	1	6	3	1	1	3	3	3	5	5	4	3	1	4	1	4	1	3
MS.L25	Lean	49	2	24.974	60	155	148	89	237	125	89	117	125	3	3	5	3	4	1	1	1	5	5	3	3	3	1	1	6	1	4	5	1	2	1	1	1	4
MS.V05	OV	59	2	25.8876	63	156	162	96	202	103	63	177	105	3	2	5	1	4	1	3	1	6	5	5	5	2	1	1	6	2	6	5	1	5	1	2	1	4
MS.V06	OV	33	2	25.721	61	154	140	107	220	124	57	190	81	4	3	5	3	5	3	2	3	6	4	1	1	4	3	1	5	2	4	4	1	1	3	3	1	3
MS.V10	OV	50	2	25.7944	56.5	148	148	92	193	120	59	71	105	3	3	3	1	3	1	3	1	4	5	1	5	3	3	3	6	2	3	4	5	6	1	2	2	2
MS.V13	OV	34	2	28.6917	62	147	119	70	151	74	62	77	93	5	4	4	1	5	1	1	2	6	1	1	1	3	2	1	6	1	6	6	1	6	3	5	1	2
MS.V15	OV	60	2	28.3531	69	156	148	90	287	205	50	158	100	4	2	6	1	3	4	2	4	4	4	3	3	2	2	2	6	1	6	3	5	6	1	4	1	2
MS.V17	OV	33	2	28.4444	64	150	133	102	251	145	82	119	107	4	3	3	1	4	5	3	1	6	1	1	1	3	3	3	4	3	4	4	1	1	1	1	1	3
MS.V18	OV	37	1	27.7551	85	175	126	82	234	166	35	167	94	4	3	5	3	4	5	3	4	6	4	1	5	5	6	4	6	1	6	6	1	6	6	5	6	1
MS.V21	OV	36	2	27.852	74	163	133	85	243	138	76	143	99	6	4	3	4	4	2	2	2	2	6	1	1	2	2	2	4	2	4	2	1	1	1	2	1	6
PD.B07	OB	30	2	33.7325	80	154	118	79	149	79	49	102	78	6	6	6	1	5	4	4	4	4	4	4	4	4	4	3	4	5	4	4	5	5	2	3	1	2
MC.B13	OB	71	1	33.3866	92	166	162	87	180	106	39	173	103	4	4	4	2	6	2	3	4	6	3	2	1	1	5	2	6	2	3	6	2	6	1	1	4	2
PR.B21	OB	65	1	34.2857	105	175	124	87	193	95	37	307	110	3	3	4	3	4	1	3	1	6	3	1	1	1	1	3	6	3	4	5	1	6	4	3	2	5
MU.B22	OB	33	1	30.0408	92	175	126	75	240	166	51	116	98	5	4	3	2	4	4	3	4	4	6	2	3	2	2	2	4	3	5	4	4	3	1	4	2	2
MU.B23	OB	24	1	35.3415	107	174	120	76	235	161	39	173	108	6	4	3	2	4	3	2	2	3	6	1	1	1	1	2	2	4	2	2	5	5	5	3	5	4
MS.B09	OB	25	2	35.9375	92	160	153	90	148	97	34	81	107	4	3	3	3	3	3	3	4	6	6	1	1	3	3	3	6	5	4	4	1	6	3	3	6	1
MS.B16	OB	46	2	30.2222	68	150	165	98	217	94	49	368	167	6	6	6	6	6	6	6	3	6	3	1	1	3	1	6	6	1	6	6	1	1	1	6	1	3
MS.D02	T2DM	58	2	21.5645	58	164	168	94	222	124	48	251	265	3	3	6	1	3	1	3	3	6	6	1	6	2	2	3	6	2	4	4	1	1	1	4	1	1
MS.D03	T2DM	65	2	24.1415	58	155	127	83	182	86	43	267	142	4	2	6	2	4	1	2	4	6	3	1	1	3	1	2	6	2	1	3	1	1	1	1	1	1
MS.D04	T2DM	61	2	26.5625	68	160	131	80	187	91	73	112	137	3	2	6	1	4	1	1	6	1	6	1	1	2	1	1	6	1	3	4	1	1	1	1	1	1
MS.D07	T2DM	63	2	24.7325	52	145	129	83	161	42	76	210	120	4	2	4	1	3	1	2	2	3	6	3	2	1	1	2	6	1	4	1	1	6	1	1	1	1
MS.D08	T2DM	60	1	24.977	68	165	146	96	226	138	77	53	107	5	3	6	2	4	3	3	3	6	3	6	1	1	4	1	6	3	3	5	6	6	1	1	5	6
MS.D12	T2DM	50	2	32.7644	67	143	146	90	179	103	61	77	110	2	2	5	1	3	2	4	3	2	5	3	3	2	2	4	5	2	6	5	1	5	2	2	1	1
MS.D24	T2DM	65	2	24.0882	64	163	131	83	191	99	54	190	143	3	2	5	1	3	1	2	3	3	5	1	1	2	2	4	6	1	6	5	5	1	1	5	1	1
Gender: 1 (male), 2 (female)
Scoring categories (six levels): Everyday (6), 5-6 days a week (5), 3-4 days a week (4), 1-2 days a week (3), Less than once a week (2), Never (1)
	Records of frequency of consumption of yogurt/ cheese/ fermented milk, and fruits were missing for one subject (lean group)
